# Supplementary material for: Optimization of Ultrasonic Extraction to Obtain Erinacine A and Polyphenols with Antioxidant Activity from the Fungal Biomass of Hericium erinaceus
Source: PubMed Central journal article supplement (PMC7766035; doi:10.3390/foods9121889), 2020-12-18
Supplement: foods-09-01889-s001.pdf [file foods-09-01889-s001.pdf]

## Optimization of ultrasonic extraction to obtain Erinacine A and polyphenols with antioxidant activity from the fungal biomass of *Hericium erinaceus*

Mihai-Vlad Valu <sup>1,2</sup>, Liliana Cristina Soare <sup>1</sup>, Nicoleta Anca Sutan<sup>1</sup>, Catalin Ducu <sup>2</sup>, Sorin Moga <sup>2</sup>, Lucian Hritcu <sup>3</sup>, Razvan Stefan Boiangiu<sup>3</sup> and Simone Carradori <sup>4,\*</sup>

<sup>1</sup> University of Pitesti, Faculty of Science, Department of Natural Sciences, Targu din Vale Str., 110040 Pitesti, Romania; mihai.valu@upit.ro (M.V.V.); cristina.soare@upit.ro (L.C.S.); anca.sutan@upit.ro (N.A.S.)

<sup>2</sup> University of Pitesti, Regional Research and Development Center for Innovative Materials, Products and Processes from Automotive Industry, 11 Doaga Str., 110440 Pitesti, Arges, Romania; catalin.ducu@upit.ro (C.D.); sorin.moga@upit.ro (S.M.)

<sup>3</sup> Alexandru Ioan Cuza University of Iasi, Department of Biology, Bd. Carol I, No. 11, Iasi 700506 Romania; hritcu@uaic.ro (L.H.); razvan.boiangiu@student.uaic.ro (R.S.B.)

<sup>4</sup> G. d'Annunzio" University of Chieti-Pescara, Department of Pharmacy, Via dei Vestini 31, Chieti 66100, Italy; simone.carradori@unich.it (S.C.)

\* Correspondence: simone.carradori@unich.it

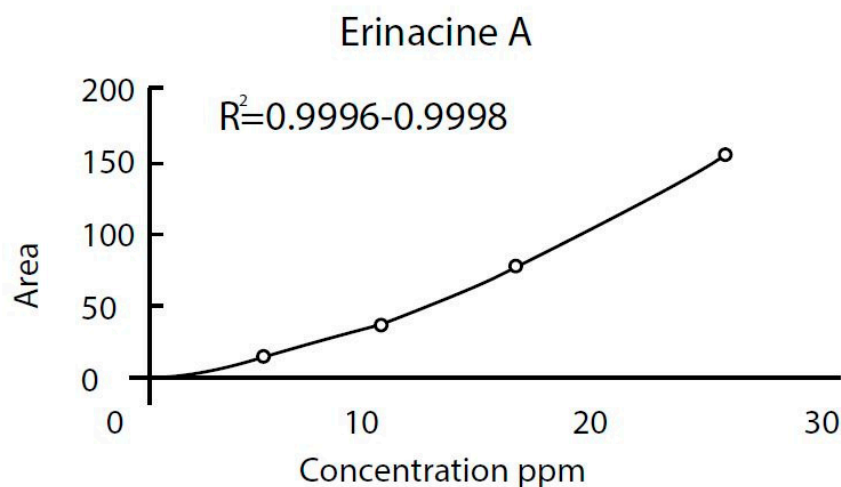

Figure 1. Erinacine A calibration curve for the applied HPLC method.
